# Supplementary material
Source: PubMed Central journal article supplement (PMC5714766)
Supplement: ajtr0009-4785-f10.pdf [file ajtr0009-4785-f10.pdf]

## CD44 may not be a marker of glioma stem cells

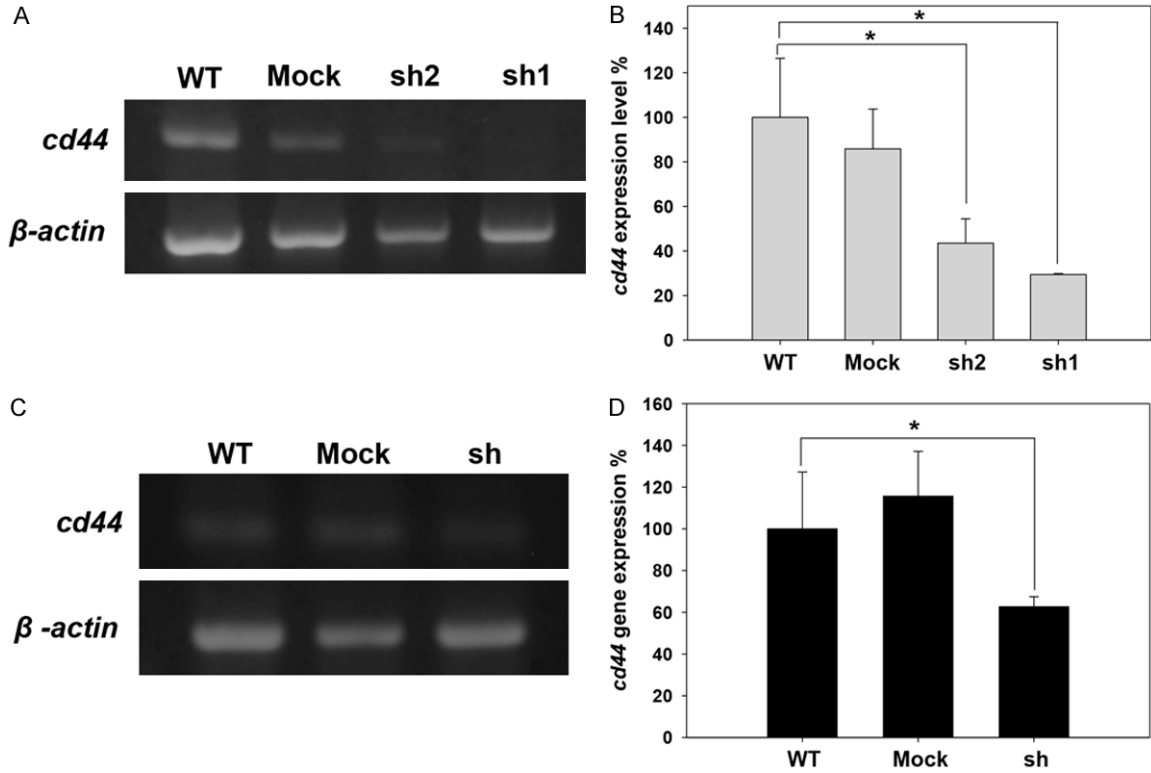

**Supplementary Figure 1.** Expression of CD44 gene in C6 and U87 glioma cell lines. The cells were collected at the cell density about  $3 \times 10^6$  cells/10 cm<sup>2</sup> culture dish. The CD44 gene expression was analyzed by RT-PCR. A. The expression of CD44 mRNA in C6 cell lines. B. Quantification of CD44 mRNA expression in C6 cell lines. C. The expression of CD44 mRNA in U87 cell lines. D. Quantification of CD44 mRNA expression in U87 cell lines (\**p* value < 0.05).

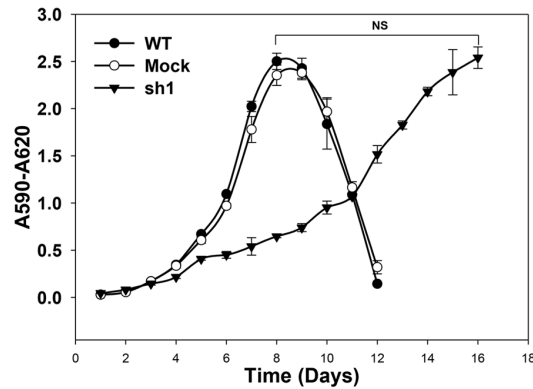

**Supplementary Figure 2.** The growth curve of C6 cell lines. The mitochondria activity of WT, mock and sh1 cells was analyzed every 24 hour over a period of 384 hour by MTT assay. (-▲-) WT, (-○-) mock, (-▼-) sh1. n = 3. (NS: non-significant difference).
